# Supplementary material
Source: publisher figshare collection journal article supplement (https://geolsoc.figshare.com/ndownloader/files/5425970)
Supplement: Supplementary file 1 [file 5425970]

	ISOTOPIC RATIOS							CALCULATED AGES Ma
Analysis	207Pb/235U	� 1 sigma	206Pb/238U	� 1 sigma	207Pb/206Pb	� 1 sigma		207Pb/235U	� 1 sigma	206Pb/238U	� 1 sigma	207Pb/206Pb	� 1 sigma
	Sample NF 95
# 1	0.659	0.016	0.0778	0.0015	0.0605	0.0010		514	10	483	9	621	36
# 2	0.647	0.018	0.0825	0.0014	0.0566	0.0010		506	11	511	8	474	41
# 3	0.696	0.014	0.0833	0.0012	0.0604	0.0011		536	8	516	7	616	40
# 4	0.657	0.016	0.0796	0.0014	0.0595	0.0010		513	10	494	9	586	37
# 5	0.656	0.017	0.0819	0.0013	0.0589	0.0010		512	11	507	8	562	39
# 6	0.670	0.016	0.0819	0.0014	0.0592	0.0012		521	10	507	9	575	45
# 7	0.690	0.015	0.0821	0.0015	0.0610	0.0011		533	9	508	9	639	40
# 8	0.699	0.021	0.0859	0.0012	0.0589	0.0015		538	12	531	7	565	55
# 9	0.632	0.020	0.0761	0.0021	0.0592	0.0010		497	12	473	13	574	38
# 10	0.673	0.016	0.0827	0.0012	0.0590	0.0011		522	10	512	7	567	42
# 11	1.638	0.048	0.1666	0.0031	0.0716	0.0014		985	18	993	17	975	39
# 12	1.850	0.041	0.1786	0.0027	0.0740	0.0013		1063	15	1060	15	1041	34
# 13	3.025	0.075	0.2331	0.0048	0.0933	0.0012		1414	19	1351	25	1493	24
# 14	3.156	0.061	0.2372	0.0046	0.09609	0.00070		1446	15	1372	24	1550	14
# 15	3.150	0.068	0.2392	0.0046	0.09468	0.00089		1445	17	1383	24	1522	18
# 16	3.190	0.056	0.2410	0.0040	0.0937	0.0010		1455	14	1392	21	1503	20
# 17	4.557	0.099	0.2968	0.0057	0.1097	0.0017		1741	18	1675	29	1795	28
# 18	4.51	0.11	0.3026	0.0056	0.1070	0.0018		1732	21	1704	27	1749	31
# 19	4.83	0.10	0.3233	0.0037	0.1088	0.0020		1789	18	1806	18	1779	33
# 20	3.248	0.064	0.2537	0.0036	0.0929	0.0011		1469	15	1457	19	1487	22
# 21	3.107	0.084	0.2414	0.0056	0.09360	0.00095		1434	21	1394	29	1500	19
# 22	3.022	0.084	0.2364	0.0062	0.0939	0.0010		1413	21	1368	32	1506	20
# 23	2.882	0.093	0.2220	0.0074	0.09367	0.00088		1377	24	1292	39	1502	18
# 24	3.006	0.075	0.2320	0.0056	0.09485	0.00095		1409	19	1345	29	1525	19
# 25	2.888	0.075	0.2268	0.0051	0.09408	0.00074		1379	20	1318	27	1510	15
# 26	0.650	0.013	0.0788	0.0012	0.05885	0.00095		508	8	489	7	561	35
# 27	0.643	0.015	0.0790	0.0015	0.0589	0.0011		504	9	490	9	562	40
# 28	0.630	0.017	0.0804	0.0014	0.0568	0.0011		496	11	498	9	485	41
# 29	0.663	0.020	0.0807	0.0016	0.0597	0.0013		516	12	501	10	592	47
# 30	0.670	0.018	0.0830	0.0015	0.0586	0.0013		521	11	514	9	554	49
# 31	2.883	0.065	0.2265	0.0045	0.0928	0.0010		1378	17	1316	24	1484	20
# 32	0.669	0.018	0.0848	0.0013	0.0572	0.0012		520	11	525	8	499	46
# 33	0.636	0.017	0.0814	0.0014	0.0580	0.0012		500	10	504	8	530	46
# 34	4.92	0.11	0.3245	0.0046	0.1089	0.0021		1806	19	1812	22	1782	35
# 35	0.654	0.011	0.0819	0.0011	0.05813	0.00093		511	7	507	7	535	35
# 36	0.633	0.018	0.0827	0.0010	0.0564	0.0012		498	11	512	6	468	48
# 37	4.774	0.099	0.3205	0.0041	0.1088	0.0024		1780	17	1792	20	1780	39
# 38	5.14	0.12	0.3353	0.0047	0.1099	0.0026		1842	19	1864	23	1797	42
# 39	1.758	0.057	0.1710	0.0027	0.0773	0.0024		1030	21	1018	15	1129	63
# 40	1.736	0.091	0.1732	0.0038	0.0744	0.0039		1022	34	1030	21	1052	107
# 41	4.535	0.083	0.3051	0.0049	0.1075	0.0012		1737	15	1717	24	1758	21
# 42	4.80	0.15	0.3190	0.0083	0.1104	0.0030		1785	27	1785	41	1806	49
# 43	4.62	0.17	0.3140	0.0086	0.1066	0.0022		1753	30	1760	42	1742	38
# 44	0.728	0.030	0.0874	0.0023	0.0604	0.0019		555	18	540	13	618	66
# 45	0.678	0.015	0.0843	0.0011	0.0588	0.0011		526	9	522	7	560	41
# 46	0.690	0.018	0.0858	0.0013	0.0582	0.0014		533	11	531	8	539	54
# 47	4.382	0.098	0.2945	0.0055	0.1088	0.0011		1709	18	1664	27	1780	19
# 48	0.681	0.023	0.0859	0.0014	0.0576	0.0014		527	14	531	8	516	55
# 49	0.648	0.017	0.0817	0.0013	0.0577	0.0012		507	10	506	8	517	44
# 50	0.592	0.014	0.0753	0.0013	0.05799	0.00092		472	9	468	8	529	35
# 51	0.609	0.015	0.0779	0.0013	0.05753	0.00095		483	10	483	8	512	36
# 52	3.167	0.057	0.2458	0.0035	0.0952	0.0010		1449	14	1417	18	1532	19
# 53	5.05	0.13	0.3299	0.0060	0.1113	0.0021		1827	21	1838	29	1820	35
# 54	1.620	0.055	0.1695	0.0025	0.0697	0.0021		978	21	1009	14	918	61
# 55	1.556	0.049	0.1569	0.0035	0.0721	0.0018		953	20	939	19	989	50
# 56	0.674	0.017	0.0831	0.0016	0.0593	0.0010		523	10	515	9	577	36
# 57	3.213	0.046	0.2466	0.0033	0.09554	0.00080		1460	11	1421	17	1539	16
# 58	0.655	0.017	0.0786	0.0014	0.0603	0.0011		511	11	488	8	615	39
	Sample WZ 022
# 1	0.750	0.027	0.0925	0.0014	0.0603	0.0019		568	15	570	8	615	69
# 2	0.789	0.024	0.0925	0.0016	0.0628	0.0015		591	14	571	9	701	51
# 3	0.729	0.047	0.0927	0.0022	0.0565	0.0033		556	28	571	13	471	131
# 4	0.779	0.028	0.0931	0.0022	0.0615	0.0017		585	16	574	13	655	60
# 5	0.761	0.030	0.0915	0.0019	0.0633	0.0024		575	17	565	11	717	81
# 6	0.723	0.040	0.0926	0.0028	0.0571	0.0019		552	23	571	17	497	73
	Sample WZ 186
# 1	0.782	0.024	0.0908	0.0015	0.0629	0.0017		585	14	560	9	705	57
# 2	0.815	0.018	0.0913	0.0011	0.0648	0.0014		603	10	563	7	769	47
# 3	0.718	0.029	0.0890	0.0019	0.0595	0.0016		548	17	550	11	587	57
# 4	0.738	0.041	0.0940	0.0020	0.0579	0.0026		560	24	580	12	526	99
# 5	0.770	0.024	0.0903	0.0016	0.0625	0.0018		578	14	558	9	692	60
# 6	0.743	0.050	0.0906	0.0031	0.0585	0.0035		562	29	559	19	549	130
# 7	0.783	0.032	0.0950	0.0017	0.0592	0.0025		585	18	585	10	573	90
# 8	0.730	0.036	0.0926	0.0017	0.0576	0.0023		555	21	571	10	515	87
# 9	0.742	0.025	0.0879	0.0018	0.0610	0.0022		562	14	544	11	638	79
# 10	0.788	0.021	0.0925	0.0016	0.0606	0.0013		588	12	571	9	624	47
# 11	0.697	0.034	0.0912	0.0018	0.0566	0.0021		535	20	563	10	476	82
# 12	0.754	0.024	0.0932	0.0015	0.0575	0.0014		569	14	575	9	512	53
# 13	0.816	0.035	0.0931	0.0022	0.0637	0.0027		604	19	574	13	732	91
# 14	0.762	0.039	0.0931	0.0017	0.0588	0.0027		573	22	574	10	559	101
# 15	0.785	0.032	0.0946	0.0022	0.0603	0.0023		587	18	583	13	614	82
# 16	0.790	0.027	0.0939	0.0015	0.0615	0.0019		590	15	579	9	656	65
# 17	0.732	0.032	0.0940	0.0016	0.0580	0.0023		556	19	580	10	531	86
# 18	0.782	0.041	0.0958	0.0023	0.0606	0.0031		585	23	590	14	626	110
# 19	0.769	0.045	0.0913	0.0029	0.0615	0.0025		577	25	564	17	657	87
# 20	0.772	0.037	0.0931	0.0022	0.0603	0.0025		579	21	574	13	613	90
# 21	0.744	0.026	0.0941	0.0017	0.0574	0.0020		563	15	580	10	506	75
# 22	0.748	0.029	0.0962	0.0020	0.0564	0.0021		565	17	593	12	469	82
	Sample P080204-14 pink grains
# 1	0.822	0.016	0.1001	0.0016	0.05881	0.00082		609	9	615	9	560	30
# 2	0.880	0.015	0.1007	0.0017	0.0614	0.0010		641	8	618	10	654	35
# 3	0.831	0.019	0.1005	0.0014	0.0589	0.0011		614	10	617	8	563	40
# 4	0.874	0.021	0.1046	0.0026	0.0602	0.0020		638	11	641	15	612	72
# 5	0.849	0.021	0.1029	0.0013	0.0591	0.0011		624	11	631	8	571	42
# 6	0.849	0.013	0.1045	0.0011	0.0596	0.0010		624	7	641	7	590	35
# 7	0.896	0.021	0.1039	0.0019	0.0622	0.0012		649	11	637	11	683	40
# 8	0.863	0.018	0.1035	0.0014	0.0605	0.0010		632	10	635	8	621	36
# 9	0.886	0.023	0.1027	0.0016	0.0625	0.0012		644	12	630	10	690	42
	Sample P080204-14 clear grains
# 1	0.841	0.030	0.1064	0.0015	0.0574	0.0020		620	16	652	9	507	77
# 2	0.937	0.029	0.1069	0.0013	0.0625	0.0024		671	15	655	8	691	80
# 3	0.833	0.037	0.1072	0.0015	0.0565	0.0024		615	21	656	9	470	93
# 4	0.820	0.035	0.1026	0.0018	0.0587	0.0020		608	20	630	11	555	73
# 5	0.864	0.037	0.1043	0.0018	0.0600	0.0025		633	20	640	11	603	91
# 6	0.863	0.029	0.1046	0.0014	0.0595	0.0017		632	16	641	8	585	64
# 7	0.939	0.039	0.1044	0.0019	0.0645	0.0024		672	20	640	11	759	80
# 8	0.879	0.037	0.1060	0.0017	0.0596	0.0025		640	20	650	10	587	90
# 9	0.919	0.036	0.1050	0.0014	0.0648	0.0025		662	19	644	8	767	81
# 10	0.873	0.034	0.1043	0.0016	0.0608	0.0024		637	18	639	9	634	83
# 11	0.841	0.034	0.1043	0.0016	0.0588	0.0019		620	19	640	9	560	71
# 12	0.880	0.029	0.1047	0.0016	0.0608	0.0019		641	15	642	9	631	68
# 13	0.922	0.032	0.1076	0.0014	0.0619	0.0022		663	17	659	8	670	77
	Sample NF 40
# 1	0.967	0.052	0.1026	0.0033	0.0700	0.0040		687	27	630	19	927	117
# 2	0.882	0.059	0.0995	0.0023	0.0644	0.0043		642	32	612	13	753	140
# 3	0.912	0.051	0.1011	0.0030	0.0646	0.0033		658	27	621	18	761	108
# 4	0.933	0.045	0.1043	0.0026	0.0660	0.0033		669	23	640	15	806	104
# 5	0.785	0.040	0.1010	0.0035	0.0543	0.0030		588	23	620	20	382	124
# 6	0.776	0.041	0.1028	0.0021	0.0574	0.0027		583	23	631	12	509	104
# 7	0.930	0.058	0.1009	0.0031	0.0660	0.0038		668	30	619	18	808	121
# 8	0.833	0.045	0.0997	0.0028	0.0612	0.0031		615	25	613	17	647	110
